# Supplementary material for: Is Total Serum Nitrite and Nitrate (NOx) Level in Dengue Patients a Potential Prognostic Marker of Dengue Hemorrhagic Fever?
Source: Hindawi journal article supplement (doi:10.1155/2018/5328681), 2018-07-05
Supplement: f1 [file 5328681.f1.pdf]

## Supplementary Materials

**Supplementary Table 1: Mean±SD values of serum NO<sub>x</sub> and NO<sub>2</sub><sup>-</sup> in the study group at different disease stages and at different days of fever upon admission.**

| Category      | N                      | NOx (μM)<br>Mean±SD |             | NO <sub>2</sub> <sup>-</sup> (μM)<br>Mean±SD |                                   |             |
|---------------|------------------------|---------------------|-------------|----------------------------------------------|-----------------------------------|-------------|
| DFA           | 145                    | 4.95 ±1.32          |             | 1.29 ± 0.64                                  |                                   |             |
| DFD           | 82                     | 4.86 ± 1.22         |             | 1.26 ± 0.56                                  |                                   |             |
| DF-CON        | 10                     | 4.71 ± 1.11         |             | 0.88 ± 0.42                                  |                                   |             |
| DHFA          | 74                     | 4.04 ± 1.12         |             | 1.37 ± 0.87                                  |                                   |             |
| DHFC          | 53                     | 4.12 ± 1.23         |             | 1.65 ± 1.47                                  |                                   |             |
| DHFD          | 50                     | 4.16 ± 1.18         |             | 1.24 ± 0.71                                  |                                   |             |
| DHF-CON       | 12                     | 4.08 ± 1.32         |             | 0.84 ± 0.41                                  |                                   |             |
| HC            | 77                     | 3.29 ± 0.68         |             | 0.56 ± 0.28                                  |                                   |             |
| Days of fever | Number of<br>Patientes |                     | NOx (μM)    |                                              | NO <sub>2</sub> <sup>-</sup> (μM) |             |
|               | DF                     | DHF                 | DFA         | DHFA                                         | DFA                               | DHFA        |
| Day 2         | 11                     | 3                   | 4.85 ± 1.42 | 3.78 ± 0.64                                  | 1.37 ± 0.32                       | 0.95 ± 0.27 |
| Day 3         | 33                     | 23                  | 5.16 ± 1.05 | 3.67 ± 0.69                                  | 1.48 ± 0.52                       | 0.86 ± 0.50 |
| Day 4         | 47                     | 21                  | 5.46 ± 2.07 | 4.29 ± 1.38                                  | 1.49 ± 1.01                       | 1.53 ± 0.80 |
| Day 5         | 31                     | 18                  | 4.59 ± 1.34 | 4.30 ± 1.47                                  | 1.02 ± 0.52                       | 1.57 ± 0.81 |
| Day 6         | 15                     | 6                   | 4.75 ± 0.73 | 5.08 ± 1.54                                  | 1.74 ± 0.62                       | 1.57 ± 1.16 |
| Day 7         | 8                      | 3                   | 4.47 ± 0.95 | 4.21± 1.08                                   | 0.99 ± 0.82                       | 0.92 ± 0.55 |

**Supplementary Table 2: Association between NOx levels and clinical parameters of DF and DHF patients (Pearson correlation)**

| Clinical parameters                  | DF           |          | DHF          |          |
|--------------------------------------|--------------|----------|--------------|----------|
|                                      | significance | r -value | significance | r- value |
| Pulse rate (beats/min)               | 0.323        | 0.233    | 0.552        | 0.155    |
| Pulse pressure (mmHg)                | 0.428        | 0.182    | 0.178        | 0.180    |
| Respiratory rate (breaths/min)       | 0.840        | 0.050    | 0.227        | -0.279   |
| Platlet count ( $10^3/\text{mm}^3$ ) | 0.627        | -0.119   | 0.527        | -0.160   |
| Hematocrit (%)                       | 0.354        | 0.189    | 0.185        | -0.249   |
| Leukocyte count ( $\times 1,000$ )   | 0.496        | 0.189    | 0.251        | -0.216   |
| Alanineaminotransferase (ALT)(U/L)   | 0.167        | 0.279    | 0.361        | 0.173    |
| Aspartateaminotransferase (AST)(U/L) | 0.586        | 0.133    | 0.738        | 0.070    |
